# Supplementary material for: Development of a PMMA-based Droplet microfluidic device for High-throughput Screening in Health care Applications
Source: Research Square preprint supplement (doi:10.21203/rs.3.rs-6102019/v1), 2025-04-29
Supplement: Supplementary file 1 [file ab93c527d79aa417acf65278.docx]

**“Development of a PMMA-based Droplet microfluidic device for High-throughput Screening in Health care Applications”**

Kaavya Purushothaman1, Ashwin Kumar Narasimhan2,Gnanavel S*1

*1Biomaterials Lab, Department of Biomedical Engineering, SRM Institute of Science and Technology, Kattankulathur-603203, Tamil Nadu, India.*

*2Department of Biomedical Engineering, College of Engineering and Applied Science, University of Wisconsin Milwaukee, Milwaukee, WI 53211, USA.*

**Corresponding Author Email Id: gnanaves@srmist.edu.in*

**Supplementary Information**

**
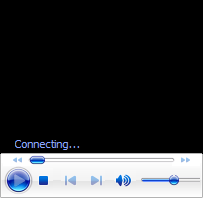
**

**FRR – 0.01**

**
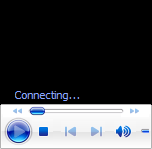
**

**FRR – 0.1**

**
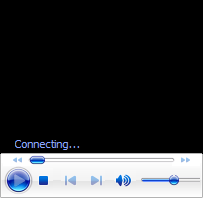
**

**FRR – 0.02**

**
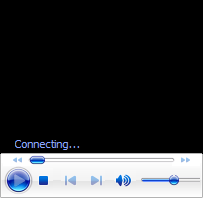
**

**FRR – 0.2**

**
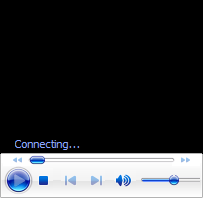
**

**FRR – 0.03**

**
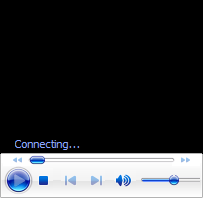
**

**FRR – 0.05**

**
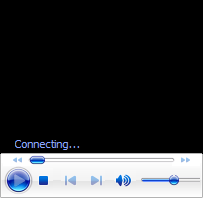
**

**FRR – 0.016**
